# Supplementary material for: Intestinal S100/Calgranulin Expression in Cats with Chronic Inflammatory Enteropathy and Intestinal Lymphoma
Source: MDPI journal article supplement (doi:10.3390/ani12162044), 2022-08-11
Supplement: s1 [file s1]

## Intestinal S100/Calgranulin Expression in Cats with Chronic Inflammatory Enteropathy and Intestinal Lymphoma

Denise S. Riggers <sup>1</sup>, Corinne Gurtner <sup>2</sup>, Martina Protschka <sup>3</sup>, Denny Böttcher <sup>4</sup>, Wolf von Bomhard <sup>5</sup>, Gottfried Alber <sup>3</sup>, Karsten Winter <sup>6</sup>, Joerg M. Steiner <sup>7</sup> and Romy M. Heilmann <sup>1,\*</sup>

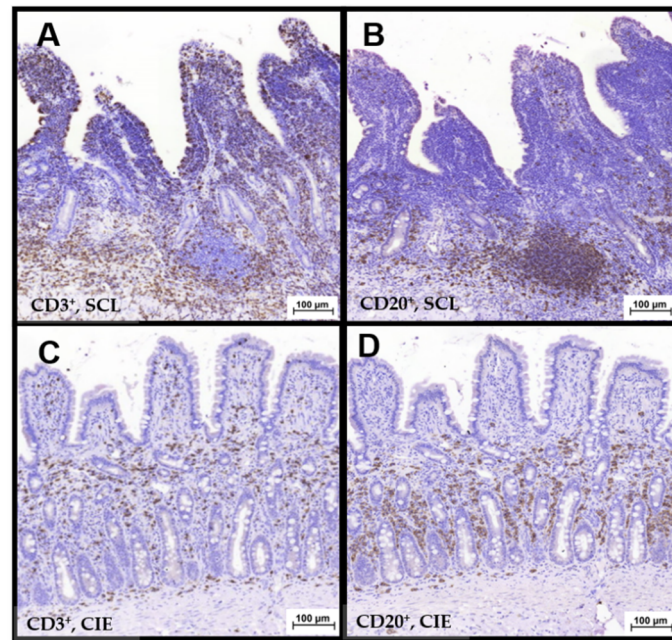

**Figure S1.** CD staining for T and B lymphocyte populations. Positive staining (brown) for CD3 (T cells; panels A&C) and CD20 (B cells; B&D) in the duodenal mucosa of a cat diagnosed with small-cell lymphoma (A&B) and a cat with CIE (C&D).

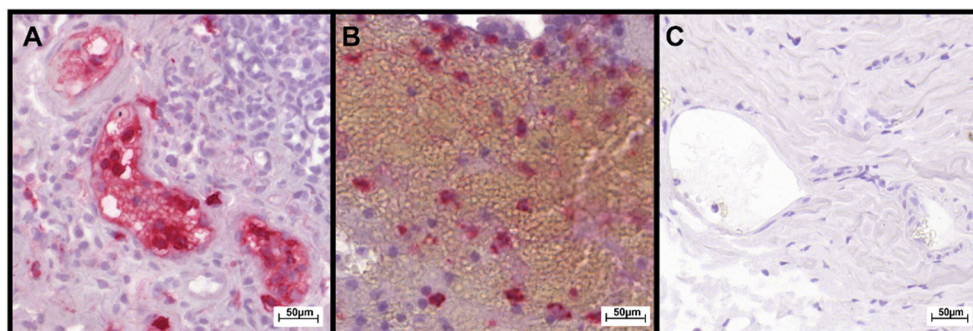

**Figure S2.** Intestinal blood vessels containing polymorphonuclear cells. (A) S100A8/A9 immunohistochemistry (IHC), (B) S100A12<sup>+</sup> cells within an intestinal blood vessel, (C) negative IHC control.

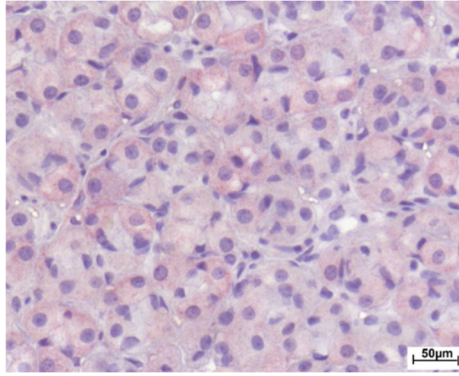

**Figure S3.** Slight nonspecific background staining (S100A8/A9-IHC) of gastric parietal cells.

**Table S1.** Patient characteristics, clinical findings, and clinicopathologic parameters in cats with chronic inflammatory enteropathy (CIE;  $n = 16$ ), alimentary lymphoma ( $n = 8$ ), and controls without histologic lesions ( $n = 16$ ) included in the study.

| Patient Characteristic                                | CIE                           | Lymphoma <sup>†</sup>         | Controls                        |
|-------------------------------------------------------|-------------------------------|-------------------------------|---------------------------------|
| Age in years, median (IQR)                            | 6.5 (2.5–12.0) <sup>A</sup>   | 12.0 (9.5–13.0) <sup>B</sup>  | 6.5 (0.5–13.5) <sup>*,A,B</sup> |
| Sex, male (neutered) / female (spayed)                | 12 (11) / 4 (4)               | 4 (4) / 4 (4)                 | 8 (4) / 7 (6) <sup>†</sup>      |
| Body weight in kg, median (IQR)                       | 4.2 (3.0–4.8)                 | 3.5 (2.5–4.0)                 | 3.9 (2.6–4.4) <sup>§</sup>      |
| Breed, $n$ (%)                                        |                               |                               |                                 |
| - Domestic (European) Shorthair                       | 12 (75%)                      | 8 (100%)                      | 8 (67%) <sup>‡</sup>            |
| - other breeds                                        | 4 (25%)                       | 0                             | 4 (33%) <sup>‡</sup>            |
| Negative retrovirus (FeLV/FIV) status                 | 10 (100%) <sup>§</sup>        | 8 (100%)                      | –                               |
| Clinical signs present in months, median (IQR)        | 5.0 (2.0–12.0)                | 2.5 (1.0–19.5)                | –                               |
| Survival time in months, median (IQR)                 | 24.0 (7.0–45.0)               | 18.0 (6.0–33.0)               | –                               |
| Number of sites biopsied, median (IQR)                | 3 (2–4)                       | 2 (2–3)                       | 2 (1–3)                         |
| Number of biopsies per site, median (IQR)             |                               |                               |                                 |
| - stomach <sup>¶</sup>                                | 8 (5–9)                       | 8 (6–10)                      | 2 (1–2)                         |
| - duodenum/prox. jejunum <sup>**</sup>                | 7 (3–11)                      | 7 (2–7)                       | 3 (1–4)                         |
| - ileum <sup>†</sup>                                  | 2 (1–5)                       | 5 (1–8)                       | 1 (1)                           |
| - colon <sup>§§</sup>                                 | 6 (5–8)                       | 5 (5)                         | 1 (1)                           |
| <i>Clinical parameters</i>                            |                               |                               |                                 |
| FCEAI score, median (IQR)                             | 7 (4–10) <sup>A</sup>         | 11 (9–12) <sup>B</sup>        | –                               |
| - mild clinical activity (score of 0–5), $n$ (%)      | 6 (38%)                       | 1 (13%)                       | –                               |
| - moderate clinical activity (score of 6–12), $n$ (%) | 10 (62%)                      | 5 (62%)                       | –                               |
| - severe clinical activity (score of 13–19), $n$ (%)  | 0                             | 2 (25%)                       | –                               |
| - severity of vomiting                                | 1 (1–2)                       | 1 (1–1.5)                     | –                               |
| - severity of diarrhea                                | 1.5 (0–2)                     | 1.5 (0–2)                     | –                               |
| - severity of weight loss                             | 2 (0–2) <sup>A</sup>          | 3 (2–3) <sup>B</sup>          | –                               |
| - severity of hyporexia                               | 1 (0–2)                       | 2 (1–2)                       | –                               |
| Presence of endoscopic lesions, $n$ (%)               | 13 (85%)                      | 8 (100%)                      | –                               |
| - stomach                                             | - 8/13 (62%)                  | - 2/2 (100%)                  | –                               |
| - duodenum                                            | - 9/13 (69%)                  | - 6/6 (100%)                  | –                               |
| - ileum                                               | - 4/6 (67%)                   | - 3/3 (100%)                  | –                               |
| - colon                                               | - 7/11 (64%)                  | - 1/1 (100%)                  | –                               |
| Presence of dermatological signs, $n$ (%)             | 2 (13%)                       | 1 (13%)                       | –                               |
| <i>Clinicopathologic parameters</i>                   |                               |                               |                                 |
| Serum cobalamin in pmol/L, median (IQR)               | 257 (111–1,002) <sup>†</sup>  | 102 (77–155)                  | –                               |
| Hypocobalaminemia (<199 pmol/L), $n$ (%)              | 7 (44%) <sup>†,A</sup>        | 7 (88%) <sup>B</sup>          | –                               |
| Serum folate in nmol/L, median (IQR)                  | 40.0 (23.0–48.0) <sup>§</sup> | 38.5 (21.1–65.4) <sup>§</sup> | –                               |
| Hypofolatemia (<25.2 nmol/L), $n$ (%)                 | 3 (19%) <sup>§</sup>          | 2 (25%) <sup>§</sup>          | –                               |
| Hyperfolatemia (>49.0 nmol/L), $n$ (%)                | 2 (13%) <sup>§</sup>          | 2 (25%) <sup>§</sup>          | –                               |
| Serum total protein in g/L, median (IQR)              | 69.0 (59.5–79.0)              | 71.5 (66.5–75.5)              | –                               |
| Hypoproteinemia (<59 g/L), $n$ (%)                    | 3 (19%)                       | 1 (13%)                       | –                               |
| Hyperproteinemia (>87 g/L), $n$ (%)                   | 0                             | 1 (13%)                       | –                               |
| Serum albumin in g/L, median (IQR)                    | 28.0 (24.5–34.0)              | 28.5 (24.8–32.5)              | –                               |
| Hypoalbuminemia (<27 g/L), $n$ (%)                    | 8 (50%)                       | 4 (50%)                       | –                               |
| Serum globulin in g/L, median (IQR)                   | 40.0 (31.3–46.3)              | 40.5 (38.0–48.3)              | –                               |

|                                                         |                                |                             |   |
|---------------------------------------------------------|--------------------------------|-----------------------------|---|
| Hyperglobulinemia (>47 g/L), <i>n</i> (%)               | 3 (19%)                        | 2 (25%)                     | – |
| Serum total calcium in mmol/L, median (IQR)             | 2.25 (2.18–2.49) <sup>†</sup>  | 2.28 (2.23–2.45)            | – |
| Total hypocalcemia (<2.2 mmol/L), <i>n</i> (%)          | 7 (44%) <sup>†</sup>           | 2 (25%)                     | – |
| Serum BUN in mmol/L, median (IQR)                       | 10.1 (7.5–12.0)                | 10.6 (8.6–16.1)             | – |
| Serum BUN increase (<5.7 mmol/L), <i>n</i> (%)          | 1 (6%)                         | 2 (25%)                     | – |
| Serum phosphorus in mmol/L, median (IQR)                | 1.3 (1.1–1.6) <sup>†</sup>     | 1.1 (0.9–1.4)               | – |
| Hypophosphatemia (<0.8 mmol/L), <i>n</i> (%)            | 0 <sup>†</sup>                 | 1 (13%)                     | – |
| Serum ALT activity in U/L, median (IQR)                 | 55 (36–64)                     | 63 (48–124)                 | – |
| Serum ALP activity in U/L, median (IQR)                 | 28 (17–43) <sup>†</sup>        | 32 (28–44)                  | – |
| Serum tT4 in nmol/L, median (IQR)                       | 24.5 (20.0–27.7) <sup>††</sup> | 24.5 (17.4–28.8)            | – |
| Serum fPLI in µg/L, median (IQR)                        | 2.1 (1.1–3.5) <sup>‡</sup>     | 3.3 (1.8–5.9) <sup>§</sup>  | – |
| Serum fructosamine in µmol/L, median (IQR)              | 203 (183–247) <sup>§§</sup>    | 213 (186–240) <sup>¶¶</sup> | – |
| Serum fructosamine increase (>340 µmol/L, <i>n</i> (%)) | 1 (9%)                         | 0                           | – |
| <i>Sonographic abnormalities</i>                        |                                |                             |   |
| Increased GI wall thickness, <i>n</i> (%)               | 9 (56%)                        | 4 (50%)                     | – |
| Thickened tunica muscularis layer, <i>n</i> (%)         | 12 (75%)                       | 4 (50%)                     | – |
| Loss of GI wall layering, <i>n</i> (%)                  | 4 (25%)                        | 3 (38%)                     | – |
| Enlarged regional lymph nodes, <i>n</i> (%)             | 11 (69%)                       | 6 (75%)                     | – |
| Evidence of free abdominal fluid, <i>n</i> (%)          | 4 (25%)                        | 5 (63%)                     | – |

Note: FCEAI: feline chronic enteropathy activity index; GI: gastrointestinal; IQR: interquartile range; PCV: packed cell volume; WBC: white blood cell. <sup>‡</sup>2 cats in this group had repeated endoscopy 5 and 29 months after initial diagnosis (due to disease recurrence or relapse) but are entered only once in this group. Parameters in bold font indicate significant differences at  $p < 0.05$ . \*available from  $n = 14$  cats; §available from  $n = 6$  cats; †available from  $n = 15$  cats; ‡available from  $n = 12$  cats; §available from  $n = 10$  cats; ¶available from  $n = 35$  cats; \*\*available from  $n = 27$  cats; §§available from  $n = 19$  cats; ††available from  $n = 9$  cats; ‡‡available from  $n = 13$  cats; §§§available from  $n = 11$  cats; ¶¶available from  $n = 7$  cats.

**Table S2.** Correlation of mucosal S100/calgranulin-positive cell counts with endoscopic lesions in cats with chronic enteropathy in this study.

| Diagnostic imaging variable | Segmental S100A8/A9 <sup>+</sup> cell counts |          |                |          | Segmental S100A12 <sup>+</sup> cell counts |          |                |          |
|-----------------------------|----------------------------------------------|----------|----------------|----------|--------------------------------------------|----------|----------------|----------|
|                             | Epithelium                                   |          | Lamina propria |          | Epithelium                                 |          | Lamina propria |          |
|                             | Median (range)                               | <i>p</i> | Median (range) | <i>p</i> | Median (range)                             | <i>p</i> | Median (range) | <i>p</i> |
| <i>Endoscopy</i>            |                                              |          |                |          |                                            |          |                |          |
| Stomach                     |                                              |          |                |          |                                            |          |                |          |
| normal endoscopy            | 0 (0)                                        | 0.028    | 0 (0–3)        | 0.026    | 0 (0)                                      | 0.059    | 0 (0–0.5)      | 0.044    |
| endoscopic lesions          | 0 (0–3.5)                                    |          | 0 (0–2.5)      |          | 0 (0–2)                                    |          | 0 (0–1.5)      |          |
| Duodenum/proximal jejunum   |                                              |          |                |          |                                            |          |                |          |
| normal endoscopy            | 0.5 (0–2)                                    | 0.125    | 4 (1–21.5)     | 0.490    | 0.5 (0–3.5)                                | 0.041    | 3.5 (1–10.5)   | 0.873    |
| endoscopic lesions          | 0 (0–0.5)                                    |          | 8 (0–13.5)     |          | 0 (0–0.5)                                  |          | 4.5 (0.5–10.5) |          |
| Ileum                       |                                              |          |                |          |                                            |          |                |          |
| normal endoscopy            | 0.5 (0.5)                                    | N/A*     | 10 (10)        | N/A*     | 0 (0)                                      | N/A*     | 7.5 (7.5)      | N/A*     |
| endoscopic lesions          | 0 (0–0.5)                                    |          | 3 (0.5–12)     |          | 0 (0–0.5)                                  |          | 2 (0.5–9.5)    |          |
| Colon                       |                                              |          |                |          |                                            |          |                |          |
| normal endoscopy            | 0.5 (0–0.5)                                  | 0.077    | 2.5 (1–3.5)    | 0.151    | 0 (0)                                      | 0.0803   | 2 (0.5–3)      | 0.361    |
| endoscopic lesions          | 0 (0–0.5)                                    |          | 5.5 (1.5–10.5) |          | 0 (0–1)                                    |          | 5 (0.5–9)      |          |

\*N/A: not applicable (statistical comparison not performed as data in one group only available from  $n = 1$  cat). Parameters in bold font and green indicate significant differences at  $p < 0.05$ .
